# Supplementary material for: Anti-Biofilm and Antibacterial Activities of Cycas media R. Br Secondary Metabolites: In Silico, In Vitro, and In Vivo Approaches
Source: MDPI journal article supplement (doi:10.3390/antibiotics11080993), 2022-07-24
Supplement: s1 [file s1]

**Table S1.** Sequences of the utilized primers in the current study.

| Genes                        | Oligonucleotide sequences (5'-3')                       |
|------------------------------|---------------------------------------------------------|
| <i>esp</i>                   | F: CGGTCATACCGACGACCAAA<br>R: TGTCACATCGCCATCGACTT      |
| <i>cylL</i>                  | F: GATGGAGGGTAAGAATTATGG<br>R: GCTTCACCTCACTAAGTTTTATAG |
| <i>cylA</i>                  | F: ACTCGGGGATTGATAGGC<br>R: GCTGCTAAAGCTGCGCTT          |
| <i>Agg</i>                   | F: CACGTAATTCTTGCCCCACCA<br>R: AAACGGCAAGACAAGTAAATA    |
| <i>efaA</i>                  | F: GACAGACCCTCACGAATA<br>R: AGTTCATCATGCTGTAGTA         |
| <i>Ace</i>                   | F: CAAGCATTATTGGCAGCGTT<br>R: TCTATCACATTTCGGTTGCG      |
| 16s rRNA (housekeeping gene) | F: CCGAGTGCTTGCACTCAATTGG<br>R: CTCTTATGCCATGCGGCATAAAC |

**Table S2.** Resistance profile of the tested isolates.

| Isolate code | Resistance profile* | Isolate code | Resistance profile*   |
|--------------|---------------------|--------------|-----------------------|
| E1           | CN-E-TE             | E13          | AMP-C-TE              |
| E2           | E-AMP-C             | E14          | CN-E-AMP-AMC-C        |
| E3           | E-AMP-AMC           | E15          | CN-AMP-C              |
| E4           | AMP-TE              | E16          | AMP-C                 |
| E5           | AMP-AMC             | E17          | E-AMP-TE              |
| E6           | AMP-C-CIP           | E18          | CN-E-AMP-AMC-C        |
| E7           | E-AMP-TE            | E19          | AMP-TE                |
| E8           | TE                  | E20          | CN-E-AMP              |
| E9           | CN-E-AMP-AMC-CIP-VA | E21          | TE                    |
| E10          | E-AMP-TE            | E22          | CN-E-AMP-AMC-C-CIP-VA |
| E11          | AMP                 | E23          | E-AMP-C-TE            |
| E12          | E-TE                |              |                       |

\* Gentamicin (CN), erythromycin (E), ampicillin (AMP), amoxicillin/clavulanic acid (AMC), chloramphenicol (C), ciprofloxacin (CIP), tetracycline (TE), vancomycin (VA), and linezolid (LZD).

**Table S3.** MIC values of GINK and SOTE against *E. faecalis* isolates.

| Isolate code | MIC of GINK (µg/mL) | MIC of SOTE (µg/mL) |
|--------------|---------------------|---------------------|
| E1           | 256                 | 32                  |
| E2           | 256                 | 32                  |
| E3           | 512                 | 32                  |
| E4           | 512                 | 128                 |
| E5           | 512                 | 64                  |
| E6           | 256                 | 64                  |
| E7           | 1024                | 32                  |
| E8           | 256                 | 64                  |
| E9           | 1024                | 128                 |
| E10          | 1024                | 128                 |
| E11          | 1024                | 32                  |
| E12          | 256                 | 32                  |
| E13          | 1024                | 32                  |
| E14          | 256                 | 32                  |
| E15          | 512                 | 64                  |
| E16          | 256                 | 128                 |
| E17          | 1024                | 64                  |
| E18          | 256                 | 128                 |
| E19          | 1024                | 32                  |
| E20          | 1024                | 64                  |
| E21          | 512                 | 64                  |
| E22          | 512                 | 128                 |
| E23          | 512                 | 128                 |

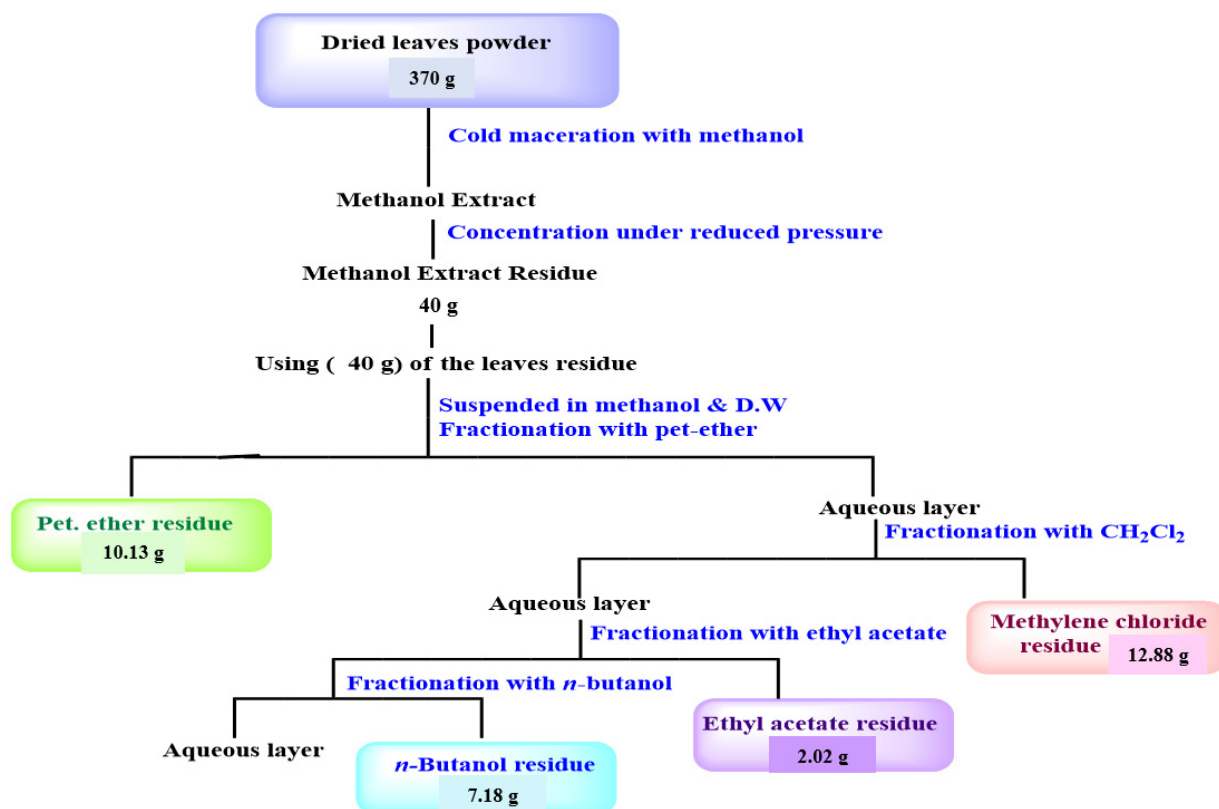

**Scheme (S1):** Extraction and fractionation steps of *Cycas media* R. Br leaves

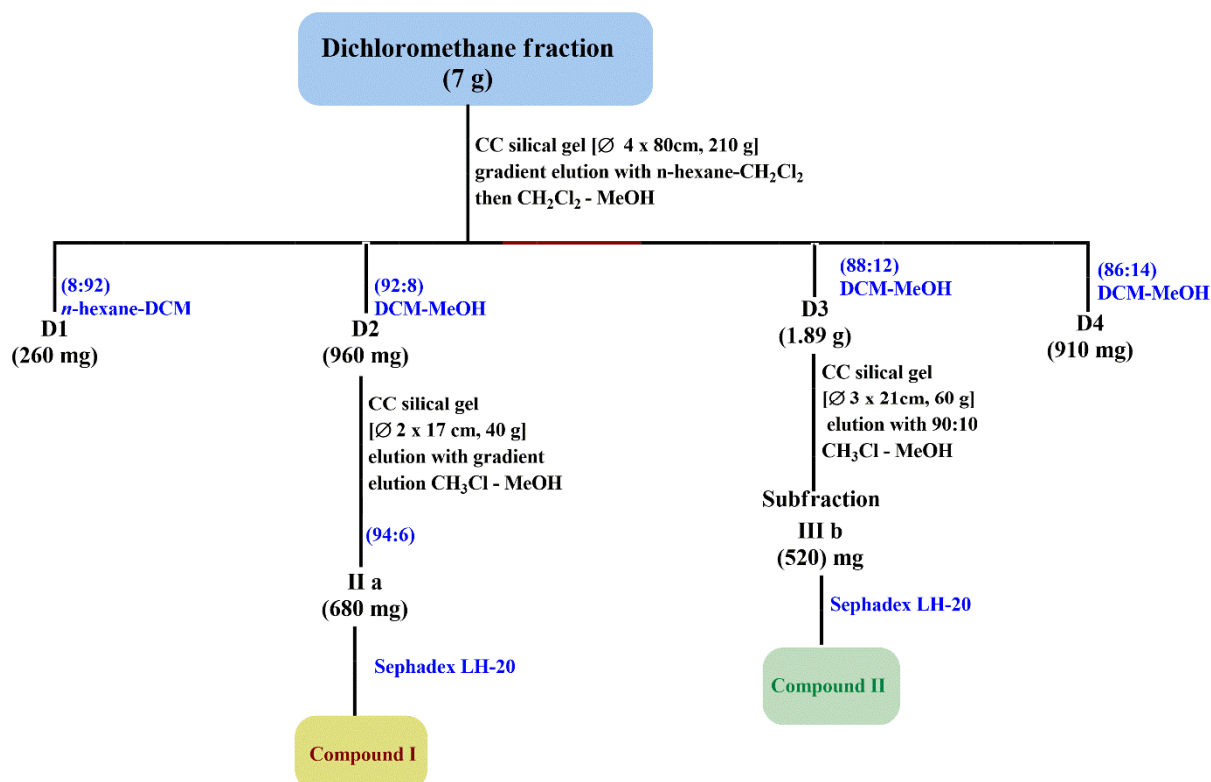

**Scheme (S2):** Column chromatography of *Cycas media* DCM fraction
